# Supplementary material for: Development of a welfare assessment tool for tourist camp elephants in Asia
Source: PeerJ. 2024 Oct 28;12:e18370. doi: 10.7717/peerj.18370 (PMC11526799; doi:10.7717/peerj.18370)
Supplement: Supplemental Information 1 [file peerj-12-18370-s001.xlsx]

## Sheet: Expert Scores
EXPERT SCORES									BEFORE REMOVAL OF MEASURES												AFTER REMOVAL OF MEASURES
Item	Measures	Expert 1	Expert 2	Expert 3	Expert 4	Expert 5	Expert 6		Item	Measures	Expert 1	Expert 2	Expert 3	Expert 4	Expert 5	Expert 6	Experts In Aggrement	I-CVI	UA		Item	Measures	Expert 1	Expert 2	Expert 3	Expert 4	Expert 5	Expert 6	Experts In Aggrement	I-CVI	UA
1	Feed variety	4	4	4	4	4	4		1	Feed variety	1	1	1	1	1	1	6	1	1		1	Feed variety	1	1	1	1	1	1	6	1	1
2	Feed frequency / Feed availability	3	4	3	4	4	4		2	Feed frequency / Feed availability	1	1	1	1	1	1	6	1	1		2	Feed frequency / Feed availability	1	1	1	1	1	1	6	1	1
3	Feed freshness	4	4	2	4	4	4		3	Feed quality and storage	1	1	1	1	1	1	6	1	1		3	Feed quality and storage	1	1	1	1	1	1	6	1	1
4	Water frequency	4	4	4	4	4	4		4	Water frequency	1	1	1	1	1	1	6	1	1		4	Water frequency	1	1	1	1	1	1	6	1	1
5	Water quality	4	4	3	3	4	4		5	Water quality	1	1	1	1	1	1	6	1	1		5	Water quality	1	1	1	1	1	1	6	1	1
6	Chain length / Enclosure Space (Day & Night)	4	4	1	3	4	4		6	Chain length / Enclosure Space (Day & Night)	1	1	1	1	1	1	6	1	1		6	Chain length / Enclosure Space (Day & Night)	1	1	1	1	1	1	6	1	1
7	Shade (Day & Night)	4	4	3	3	4	4		7	Shade (Day & Night)	1	1	1	1	1	1	6	1	1		7	Shade (Day & Night)	1	1	1	1	1	1	6	1	1
8	Hygiene (Day & Night)	4	4	4	3	4	4		8	Hygiene / Odor (Day & Night)	1	1	1	1	1	1	6	1	1		8	Hygiene / Odor (Day & Night)	1	1	1	1	1	1	6	1	1
9	Noise Type (Day & Night)	3	4	4	3	4	3		9	Privacy / Noise Level (Day & Night)	1	1	1	1	1	1	6	1	1		9	Privacy / Noise Level (Day & Night)	1	1	1	1	1	1	6	1	1
10	Substrate (Day & Night)	4	4	4	3	4	4		10	Substrate (Day & Night)	1	1	1	1	1	1	6	1	1		10	Substrate (Day & Night)	1	1	1	1	1	1	6	1	1
11	Body condition score (BCS)	4	4	3	4	4	4		11	Body condition score (BCS)	1	1	1	1	1	1	6	1	1		11	Body condition score (BCS)	1	1	1	1	1	1	6	1	1
12	Nail Score	4	4	4	4	4	4		12	Nail Score	1	1	1	1	1	1	6	1	1		12	Nail Score	1	1	1	1	1	1	6	1	1
13	Wound score	4	4	4	4	4	4		13	Wound score	1	1	1	1	1	1	6	1	1		13	Wound score	1	1	1	1	1	1	6	1	1
14	Eye Condition	3	4	4	4	4	4		14	Eye Condition	1	1	1	1	1	1	6	1	1		14	Eye Condition	1	1	1	1	1	1	6	1	1
15	Skin Condition	3	4	3	3	4	4		15	Skin Condition	1	1	1	1	1	1	6	1	1		15	Skin Condition	1	1	1	1	1	1	6	1	1
16	Health Care	4	4	2	3	4	4		16	Health Care	1	1	0	1	1	1	5	0.833333	0		16	Health Care	1	1	0	1	1	1	5	0.833	0
17	Exercise Hours	3	4	2	4	4	4		17	Fitness / Exercise	1	1	0	1	1	1	5	0.833333	0		17	Fitness / Exercise	1	1	0	1	1	1	5	0.833	0
18	Locomotion / Walking Pattern	4	4	4	4	4	4		18	Locomotion / Walking Pattern	1	1	1	1	1	1	6	1	1		18	Locomotion / Walking Pattern	1	1	1	1	1	1	6	1	1
19	Urine and feces condition	4	4	4	4	4	4		19	Urine and feces condition	1	1	1	1	1	1	6	1	1		19	Urine and feces condition	1	1	1	1	1	1	6	1	1
20	Mucous membrane condition	4	4	4	4	3	3		20	Mucous membrane condition	1	1	1	1	1	1	6	1	1		20	Mucous membrane condition	1	1	1	1	1	1	6	1	1
21	Environment Complexity	3	4	4	4	4	4		21	Environment Complexity (Day & Night)	1	1	1	1	1	1	6	1	1		21	Environment Complexity (Day & Night)	1	1	1	1	1	1	6	1	1
22	Access to Bathing	4	4	3	3	4	4		22	Access to Bathing	1	1	1	1	1	1	6	1	1		22	Access to Bathing	1	1	1	1	1	1	6	1	1
23	Movement Choice and Control	3	4	4	4	4	4		23	Movement Choice and Control (Day & Night)	1	1	1	1	1	1	6	1	1		23	Movement Choice and Control (Day & Night)	1	1	1	1	1	1	6	1	1
24	Access to foraging	3	4	4	4	4	4		24	Access to foraging	1	1	1	1	1	1	6	1	1		24	Access to foraging	1	1	1	1	1	1	6	1	1
25	Feeding behaviour	3	4	4	4	4	4		25	Feeding behaviour	1	1	1	1	1	1	6	1	1		25	Feeding behaviour	1	1	1	1	1	1	6	1	1
26	Rest/Sleep behaviour	4	4	3	4	4	4		26	Rest/Sleep behaviour	1	1	1	1	1	1	6	1	1		26	Rest/Sleep behaviour	1	1	1	1	1	1	6	1	1
27	Conspecific interaction behavior	4	4	1	4	4	3		27	Conspecific interaction behavior	1	1	0	1	1	1	5	0.833333	0		27	Conspecific interaction behavior	1	1	0	1	1	1	5	0.833	0
28	Access to social interaction	4	4	3	4	4	4		28	Access to social interaction (Day & Night)	1	1	1	1	1	1	6	1	1		28	Access to social interaction (Day & Night)	1	1	1	1	1	1	6	1	1
29	Opportunity to mate	1	4	2	4	3	3		29	Opportunity to mate	0	1	0	1	1	1	4	0.666667	0		29	Use of ankus / Control and Handling	1	1	1	1	1	1	6	1	1
30	Duration of mahout - elephant working relationship	2	4	1	3	4	4		30	Duration of mahout - elephant working relationship	0	1	0	1	1	1	4	0.666667	0		30	Human-elephant interaction (Mahout)	1	1	1	1	1	1	6	1	1
31	Mahout job satisafaction	4	4	4	4	3	4		31	Mahout job satisafaction	1	0	1	0	1	0	3	0.5	1		31	Human-elephant interaction (Tourist)	1	1	0	1	1	1	5	0.833	0
32	Use of ankus	4	4	4	4	3	4		32	Use of ankus / Control and Handling	1	1	1	1	1	1	6	1	1		32	Elephant general state (Restricted state)	1	1	1	1	1	1	6	1	1
33	Human-Elephant Interaction (Mahout)	4	4	4	4	4	4		33	Human-elephant interaction (Mahout)	1	1	1	1	1	1	6	1	1		33	Stereotypies (Restricted state)	1	1	0	1	1	1	5	0.833	1
34	Human-Elephant Interaction (Tourist)	3	4	2	4	3	4		34	Human-elephant interaction (Tourist)	1	1	0	1	1	1	5	0.833333	0		34	Elephant general state (Unrestricted state)	1	1	1	1	1	1	6	1	1
35	Elephant General State (Restricted state)	4	4	3	4	4	4		35	Elephant general state (Restricted state)	1	1	1	1	1	1	6	1	1		35	Comfort behavior - I (Unrestricted state)	1	1	1	1	1	1	6	1	1
36	Stereotypies (Restricted state)	4	4	3	4	3	4		36	Stereotypies (Restricted state)	1	1	0	1	1	1	5	0.833333	1		36	Comfort behavior - II (Unrestricted state)	1	1	1	1	1	1	6	1	1
37	Elelphant General State (Unrestricted state)	4	4	4	4	4	4		37	Elephant general state (Unrestricted state)	1	1	1	1	1	1	6	1	1				1	1	0.861	1	1	1	S-CVI/Ave(I)	0.977
38	Comfort behavior - I (Unrestricted state)	4	4	3	4	4	4		38	Comfort behavior - I (Unrestricted state)	1	1	1	1	1	1	6	1	1								S-CVI/Ave(II)	0.977	S-CVI/UA		0.888889
39	Comfort behavior - II (Unrestricted state)	3	4	3	4	4	4		39	Comfort behavior - II (Unrestricted state)	1	1	1	1	1	1	6	1	1
