# Supplementary material for: Development of a welfare assessment tool for tourist camp elephants in Asia
Source: PeerJ. 2024 Oct 28;12:e18370. doi: 10.7717/peerj.18370 (PMC11526799; doi:10.7717/peerj.18370)
Supplement: Supplemental Information 2 [file peerj-12-18370-s002.xlsx]

## Sheet: Inter - Rater Reliability
		ID - 01			ID - 02			ID - 03			ID - 04			ID - 05			ID - 06			ID - 07			ID - 08			ID - 09			ID - 10
No.	Welfare Measures	R1	R2	R3	R1	R2	R3	R1	R2	R3	R1	R2	R3	R1	R2	R3	R1	R2	R3	R1	R2	R3	R1	R2	R3	R1	R2	R3	R1	R2	R3
1	Feed Variety	0	0	0	0	0	0	0	0	0	0	0	0	0	0	0	0	0	0	0	0	0	0	0	0	0	0	0	0	0	0
2	Feed Frequency / Feed Availability	0	0	0	1	1	1	1	1	1	0	0	0	1	1	1	0	1	0	1	1	1	1	1	1	1	1	2	1	1	2
3	Feed Freshness	2	2	2	2	2	2	2	2	2	2	2	2	2	2	2	2	2	2	2	2	2	2	2	2	2	2	2	2	2	2
4	Water Frequency	1	1	1	1	1	1	1	1	1	1	1	1	1	1	1	1	1	1	1	1	1	0	0	0	1	1	1	1	1	1
5	Water Quality	1	2	1	1	2	1	2	2	2	1	2	1	1	2	1	1	2	1	1	1	1	1	1	1	1	2	1	1	2	1
6	Chain length / Enclosure Space / Confinement (Day)	0	0	0	0	0	0	0	0	0	0	0	0	0	0	0	0	0	0	0	0	0	0	0	0	0	0	0	0	0	0
7	Shade (Day)	2	2	2	2	2	2	2	2	2	2	2	2	2	2	2	2	2	2	2	2	2	2	2	2	2	2	0	2	2	2
8	Hygiene / Odor (Day)	1	1	2	1	1	2	1	1	1	1	2	2	0	1	1	1	1	1	2	2	2	2	1	2	2	2	2	2	2	2
9	Noise Level (Day)	1	1	1	2	1	1	1	1	1	1	1	1	1	1	1	1	1	2	1	1	1	1	1	1	1	1	1	1	1	1
10	Substrate (Day)	1	1	1	1	1	1	0	0	0	1	1	1	1	1	1	1	1	1	0	0	0	1	2	1	0	0	0	0	0	0
11	Chain length / Enclosure Space / Confinement (Night)	0	0	0	0	0	0	0	0	0	0	0	0	0	0	0	0	0	0	0	0	0	0	0	0	0	0	0	0	0	0
12	Shade (Night)	2	2	2	2	2	2	2	2	2	2	2	2	2	2	2	2	0	2	2	2	2	2	2	2	2	2	2	2	2	2
13	Hygiene / Odor (Night)	0	1	2	0	2	2	2	2	2	1	1	1	2	2	2	1	2	1	2	2	2	0	2	2	1	2	1	2	2	2
14	Privacy / Noise Level (Night)	2	1	1	1	1	1	2	1	1	2	1	1	2	1	1	2	1	1	2	1	1	2	1	1	2	1	1	2	1	2
15	Substrate (Night)	0	0	0	0	0	0	1	1	1	0	0	0	0	0	0	0	0	0	0	0	0	0	0	0	0	0	0	0	0	0
16	Access to Social Interaction (Daytime)	1	1	1	1	1	1	0	0	0	1	1	1	1	1	1	1	1	1	2	1	2	1	1	1	1	1	1	2	1	2
17	Access to Social Interaction (Nighttime)	1	1	1	1	1	1	0	0	0	1	0	1	1	2	2	1	1	1	2	1	2	1	1	2	1	1	1	2	1	2
18	Environment Complexity / Enrichment	0	0	0	0	0	0	0	0	0	0	0	0	0	0	0	0	0	0	1	1	1	0	0	1	0	0	0	0	0	0
19	Access to Bathing	2	2	2	2	2	2	2	2	2	2	2	2	2	2	2	2	2	2	1	1	1	2	2	2	1	2	1	1	2	2
20	Restriction Time / Movement choice and control	0	1	0	0	0	0	0	0	0	0	1	0	0	1	0	0	0	0	0	1	1	0	1	0	0	1	0	0	0	0
21	Access to Foraging	2	1	2	2	0	2	2	0	1	2	2	1	2	2	1	2	0	2	0	0	0	0	0	0	0	0	0	0	0	0
22	Use of Ankus (Control/Handling)	1	2	1	2	2	2	2	2	2	2	2	2	2	2	1	2	2	2	2	2	2	2	1	2	2	2	2	2	2	2
23	Body Condition Score (BCS)	0	0	0	1	2	2	2	2	2	0	1	1	1	2	2	0	1	1	2	1	2	1	2	1	0	1	1	2	1	1
24	Nail Score	1	2	1	1	1	1	0	1	1	1	1	0	2	2	2	1	2	1	2	2	1	2	2	2	2	2	2	2	2	2
25	Wound Score	2	2	2	2	2	2	2	2	2	1	1	1	2	2	2	2	2	2	2	2	2	2	2	2	0	1	1	2	2	1
26	Eye Condition	2	2	2	2	2	2	2	2	2	2	2	2	2	2	2	2	2	1	2	2	2	2	2	2	2	2	2	2	2	2
27	Skin Condition	2	2	1	2	2	2	2	2	2	2	2	2	0	2	2	0	0	1	2	2	2	2	2	2	1	2	1	2	2	2
28	Health Care	2	2	2	2	2	2	2	2	2	2	2	2	2	2	2	2	2	2	2	2	2	2	2	2	2	2	2	2	2	2
29	Exercise Hours	0	0	0	0	0	0	0	0	0	0	0	0	0	0	0	0	0	0	0	0	0	0	0	0	0	0	0	0	0	0
30	Locomotion / Walking Pattern	2	2	2	2	2	2	2	2	2	2	2	2	2	2	2	2	2	2	2	2	2	2	2	2	2	2	2	2	2	2
31	Urine and Feces Condition	1	2	1	1	2	2	2	2	2	2	2	0	1	2	1	2	2	2	2	2	2	1	2	2	2	2	2	2	2	2
32	Mucous Membrane Condition	1	2	2	2	2	2	2	2	2	1	2	2	2	2	2	1	2	2	2	2	2	2	2	2	2	2	2	2	2	2
33	Foraging Feeding Behavior	2	2	2	2	2	2	2	2	2	2	2	2	2	2	2	2	1	2	2	2	2	2	2	2	2	1	2	1	2	2
34	Rest / Sleep Behavior	2	2	2	2	2	2	2	2	2	2	2	2	2	2	2	2	2	2	2	2	2	2	2	2	2	2	2	2	2	2
35	Conspecific Interaction	2	2	2	1	1	0	2	2	2	2	1	2	2	2	2	2	2	2	2	2	2	2	2	2	2	2	2	2	2	2
36	Human-Elephant Interaction (Mahout)	2	2	2	1	1	0	2	2	1	2	1	2	2	2	2	2	2	2	2	2	2	1	2	2	1	1	0	2	1	1
37	Homan-Elephant Interaction (Tourist)	2	2	2	1	1	1	2	2	2	2	2	2	2	2	2	2	1	2	2	2	2	2	2	2	2	2	2	2	2	2
38	Elephant General State - Restricted State	2	2	2	0	0	2	2	2	2	2	1	2	2	2	2	2	2	2	2	1	2	0	1	0	0	1	0	2	1	2
39	Stereotypies - Restricted State	0	0	1	0	0	0	0	1	2	0	0	0	0	1	0	0	0	0	0	0	0	0	0	0	0	0	0	0	1	0
40	Elephant General State - Unrestricted State	2	1	2	1	1	1	2	2	2	2	1	2	2	1	2	2	1	2	2	1	2	2	2	2	2	1	2	1	1	1
41	Comfort Behavior I - Unrestricted State	2	2	2	2	2	2	2	2	2	2	2	2	2	2	2	2	2	2	2	2	2	2	2	2	2	2	2	2	2	2
42	Comfort Behavior II - Unrestricted State	2	2	2	2	2	2	2	2	2	2	2	2	2	2	2	2	2	2	2	1	1	2	2	2	2	2	2	2	1	1

## Sheet: Test Re-Test Reliability
		E1		E2		E3		E4		E5		E6		E7		E8		E9		E10
No.	Welfare Measures	T1	T2	T1	T2	T1	T2	T1	T2	T1	T2	T1	T2	T1	T2	T1	T2	T1	T2	T1	T2
1	Feed Variety	0	0	0	0	0	0	0	0	0	0	0	0	0	0	0	0	0	0	0	0
2	Feed Frequency / Feed Availability	1	1	1	1	1	2	1	1	1	1	1	1	1	1	1	1	1	1	1	1
3	Feed Freshness	2	2	2	2	2	2	2	2	2	2	2	2	2	2	2	2	2	2	2	2
4	Water Frequency	1	1	2	2	1	1	2	1	2	1	2	2	1	1	1	1	1	1	1	1
5	Water Quality	2	2	2	2	2	2	2	2	2	1	2	1	2	1	2	2	2	2	2	2
6	Chain length / Enclosure Space (Day)	0	0	1	1	0	0	0	0	0	1	0	0	0	0	2	2	2	2	2	2
7	Shade (Day)	2	2	1	1	1	1	2	2	2	2	2	2	2	2	1	1	1	1	1	1
8	Hygiene (Day)	2	2	2	2	2	2	2	2	2	2	2	2	2	2	2	2	2	2	2	2
9	Noise Type (Day)	0	0	0	0	0	0	0	0	0	0	0	0	0	0	1	1	1	1	1	1
10	Substrate (Day)	0	0	0	0	0	0	0	0	0	0	0	0	0	0	2	2	2	2	2	2
11	Chain length / Enclosure Space (Night)	0	0	0	0	0	0	0	0	0	0	0	0	0	0	0	0	0	0	0	0
12	Shade (Night)	2	2	2	2	1	1	2	2	2	2	2	2	2	2	1	1	2	2	1	1
13	Hygiene (Night)	2	2	2	2	2	2	2	2	2	2	2	2	2	2	1	1	2	2	0	0
14	Noise Type (Night)	1	1	0	0	0	0	0	0	1	1	0	0	0	0	1	1	1	1	1	1
15	Substrate (Night)	0	0	0	0	0	0	0	0	0	0	0	0	0	0	1	1	0	0	0	0
16	Access to Social Interaction (Daytime)	1	1	0	0	0	0	0	0	0	0	1	1	1	1	2	2	2	2	2	2
17	Access to Social Interaction (Nighttime)	0	0	0	0	0	0	0	0	0	0	1	1	0	0	0	0	0	0	1	1
18	Environment Complexity / Enrichment	0	0	2	2	0	0	0	0	0	0	0	0	0	0	2	2	2	2	2	2
19	Access to Bathing	2	2	1	1	1	1	1	1	1	1	1	1	1	1	2	2	2	2	2	2
20	Restriction Time	0	0	0	0	0	0	0	0	0	0	0	0	0	0	0	0	0	0	0	0
21	Access to Foraging	0	0	0	0	0	1	0	0	0	0	0	0	0	1	0	2	0	0	0	2
22	Use of Ankus	1	1	2	1	1	1	1	1	1	0	1	2	1	1	2	2	1	2	2	2
23	Body Condition Score (BCS)	2	1	2	1	1	0	1	1	2	1	2	3	2	2	2	2	1	1	0	1
24	Nail Score	2	2	2	1	2	2	1	1	2	2	1	1	2	1	2	2	0	1	2	2
25	Wound Score	2	2	2	2	1	1	2	2	2	2	2	2	2	2	2	2	2	0	2	2
26	Eye Condition	2	2	2	2	2	2	2	2	2	2	2	2	2	2	2	2	2	2	2	2
27	Skin Condition	1	2	0	1	0	0	2	2	2	2	2	2	0	2	1	2	2	2	2	2
28	Health Care	2	2	2	2	2	2	2	2	2	2	2	2	2	2	2	2	2	2	2	2
29	Exercise Hours	1	2	2	2	0	0	1	2	1	0	0	0	0	0	2	2	2	2	2	2
30	Locomotion / Walking Pattern	2	2	2	2	2	2	2	2	2	2	2	2	2	2	2	2	1	2	2	2
31	Urine and Feces Condition	2	2	2	2	2	2	2	2	2	2	2	2	2	2	2	2	2	2	2	2
32	Mucous Membrane Condition	2	2	2	2	2	2	2	2	2	2	1	2	2	2	2	1	1	1	2	2
33	Foraging / Feeding Behavior	1	1	1	1	1	2	1	1	1	1	1	1	1	2	1	2	1	1	1	2
34	Rest / Sleep Behavior	2	2	2	2	2	2	2	2	2	2	2	2	2	2	2	2	2	1	2	2
35	Conspecific Interaction Behavior	0	2	2	2	0	0	2	2	2	2	1	0	1	2	2	2	2	2	2	2
36	Human-Elephant Interaction (Mahout)	2	2	2	2	1	2	1	2	2	2	2	2	2	2	2	2	2	2	2	2
37	Homan-Elephant Interaction (Tourist)	2	2	2	2	0	0	1	2	2	2	1	2	1	0	2	2	1	2	2	2
38	Elephant Behavior - Restricted State	2	2	2	2	2	1	1	2	2	2	2	2	0	0	2	2	2	2	2	2
39	Stereotypies - Restricted State	0	0	2	0	0	0	2	0	0	0	0	0	0	0	0	0	0	0	0	2
40	Elephant Behavior - Unrestricted State	2	2	2	2	0	1	1	2	2	2	2	2	2	2	2	2	2	2	2	1
41	Comfort Behavior I - Unrestricted State	2	2	2	2	2	2	2	2	2	2	2	2	2	2	2	2	2	2	2	2
42	Comfort Behavior II - Unrestricted State	2	2	2	1	2	0	1	2	2	2	2	2	1	1	1	2	2	2	2	2
